# Supplementary material
Source: PubMed Central journal article supplement (PMC4375552)
Supplement: mmc2.pdf [file mmc2.pdf]

## Article

# A Well-Balanced Preexisting Equilibrium Governs Electron Flux Efficiency of a Multidomain Diflavin Reductase

Oriane Frances,<sup>1</sup> Fataneh Fatemi,<sup>1</sup> Denis Pompon,<sup>2,3,4</sup> Eric Guittet,<sup>1</sup> Christina Sizun,<sup>1</sup> Javier Pérez,<sup>5</sup> Ewen Lescop,<sup>1,\*</sup> and Gilles Truan<sup>2,3,4,\*</sup>

<sup>1</sup>Institut de Chimie des Substances Naturelles, CNRS, UPR 2301, Centre de Recherche de Gif, Gif-sur-Yvette, France; <sup>2</sup>Université de Toulouse, INSA, UPS, INP, LISBP, Toulouse, France; <sup>3</sup>INRA, UMR792 Ingénierie des Systèmes Biologiques et des Procédés, Toulouse, France; <sup>4</sup>CNRS, UMR5504, Toulouse, France; and <sup>5</sup>SWING beamline, Synchrotron SOLEIL, Gif-sur-Yvette, France

**ABSTRACT** Diflavin reductases are bidomain electron transfer proteins in which structural reorientation is necessary to account for the various intramolecular and intermolecular electron transfer steps. Using small-angle x-ray scattering and nuclear magnetic resonance data, we describe the conformational free-energy landscape of the NADPH-cytochrome P450 reductase (CPR), a typical bidomain redox enzyme composed of two covalently-bound flavin domains, under various experimental conditions. The CPR enzyme exists in a salt- and pH-dependent rapid equilibrium between a previously described rigid, locked state and a newly characterized, highly flexible, unlocked state. We further establish that maximal electron flux through CPR is conditioned by adjustable stability of the locked-state domain interface under resting conditions. This is rationalized by a kinetic scheme coupling rapid conformational sampling and slow chemical reaction rates. Regulated domain interface stability associated with fast stochastic domain contacts during the catalytic cycle thus provides, to our knowledge, a new paradigm for improving our understanding of multidomain enzyme function.

## INTRODUCTION

Many redox systems are composed of separate protein modules whose functions are conserved through evolution and can be divided into a reductase component capable of oxidizing reduced nucleotides, a transporter that shuttles electrons between the reductase module and the final electron acceptor that constitutes the third partner. Such multicomponent organization is well illustrated by the mixed-function oxidases system based on cytochrome P450 (CYP) monooxygenases. Many modular combinations of the components exist, depending on the type of transporter and reductase, leading to an important diversity of electron delivery systems (1). Diflavin reductases are key enzymes within these systems. They assemble a transporter module containing the flavin mononucleotide (FMN) cofactor, located at the N-terminus with a reductase module containing the flavin adenine dinucleotide (FAD) cofactor, located at the C-terminus on the same polypeptide joined by a connecting domain (2). This typical order (FMN-connecting-FAD) is exemplified in protein families of different physiological functions such as NADPH cytochrome P450 reductases (CPRs), nitric oxide synthases (NOS), methionine synthase reductases, the flavoprotein component of sulfite reductases, and novel diflavin oxidoreductases (1). CPR

is the obligatory electron supplier for the various eukaryotic microsomal CYPs and possesses, on top of the abovementioned domains, an N-terminal *trans*-membrane segment. CPR transfers electrons from NADPH to CYP in a precise way: NADPH → FAD → FMN → acceptor. Beyond CYP, CPR also provides electrons to other artificial acceptors such as cytochrome *c* or natural acceptors such as cytochrome *b<sub>5</sub>*, heme oxygenase, and to the fatty acid elongation system.

The arrangement of the domains in CPR was first determined from the crystal structure of the oxidized, soluble form of rat CPR (3) and was then later confirmed for oxidized CPR originating from different species (Fig. 1 *a* for human CPR), in the presence or absence of bound nucleotides (4–6). In this structure, also named closed or compact form, the two cofactors are ideally positioned for an electron transfer (ET) from FAD to FMN. However, in this structural arrangement, the FMN is well buried and far from the surface of the molecule, hence preventing ET to the various protein acceptors. Similarly, for CPR a clear demonstration of the rearrangements was obtained in 2009 with crystallographic structures of CPR mutants (7,8) evidencing large domain movements leading to open conformations compatible with external ET from FMN to acceptors (Fig. 1, *b* and *c*). Multiple groups have also evidenced small-to-large domain rearrangements by various techniques (9), ranging from small-angle x-ray scattering (SAXS) (10,11), small-angle neutron scattering (11), neutron reflectometry (12), fluorescence resonance energy transfer (13), nuclear

Submitted September 30, 2014, and accepted for publication January 21, 2015.

\*Correspondence: ewen.lescop@cnrs.fr or gilles.truan@insa-toulouse.fr

Oriane Frances and Fataneh Fatemi contributed equally to this work.

Editor: Michael Sattler.

© 2015 by the Biophysical Society  
0006-3495/15/03/1527/10 \$2.00

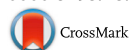

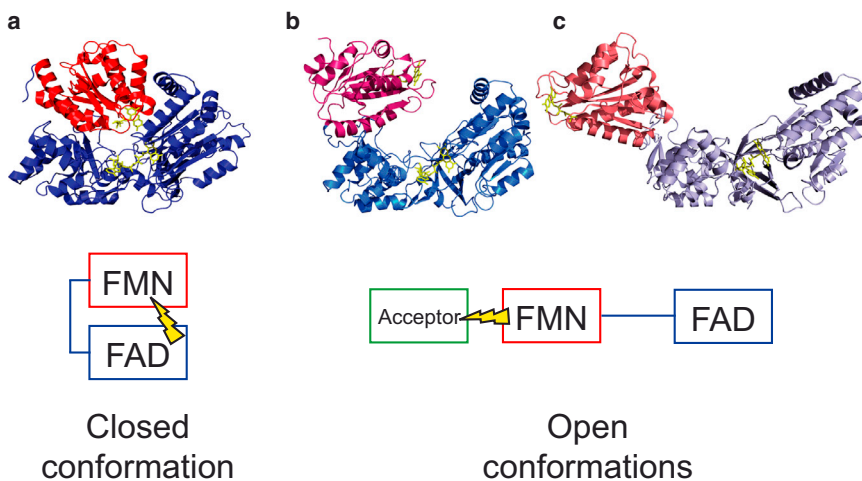

**FIGURE 1** Closed and open conformations of CPR. (a) Human CPR (Protein Data Bank (PDB) PDB 3QE2, chain A); (b)  $\Delta$ TGEE mutant of rat CPR (PDB 3ES9, chain A); (c) yeast-human chimeric CPR (PDB 3FJO). Crystallographic structures were aligned on the FAD/connecting domain (residues 248–680 in human sequence). (Red) FMN domain; (blue) FAD/connecting and linker region. (Yellow sticks) FMN and FAD moieties. (Boxes) Closed and open conformations (same color-code as structures). (Yellow flash) Symbolic representation of the ET in the two states. To see this figure in color, go online.

magnetic resonance (NMR) (10), and electron double resonance (14) to mass spectrometry (15), linked either to catalytic events (flavin reduction, ligand binding) or to the chemical environment of CPR (ionic strength of the solvent). Very recently, the crystal structure of a complex between heme oxygenase and a mutated CPR revealed a new open conformation for the CPR, providing a picture of how electrons may be transported from FMN to heme acceptors (16).

From these different studies, authors have concluded that reduction of CPR under anaerobic conditions (chemically, by either NADH or NADPH) promotes domain rearrangements leading to an equilibrium between compact and extended conformations that depends on the type of reductants. On the contrary, nucleotide binding (NADP<sup>+</sup> or 2'-5' ADP) tends to form more compact structures, with either oxidized or reduced CPR. The commonly accepted hypothesis of the domain movements occurring during catalysis is as follows (17). Upon binding of NADPH to CPR, immediately followed by FAD reduction, CPR adopts a compact form favoring ET between FAD and FMN. Release of NADP<sup>+</sup> while CPR is still reduced shifts the conformational equilibrium toward extended forms capable of ET from FMN to external acceptors. This concerted model favors a schematic view of CPR at steady state in which ET steps (FAD → FMN or FMN → acceptors) are tightly coupled with domain movements (compact or extended forms, respectively).

Ionic strength has long been recognized as an important factor influencing ET from CPR to acceptors (18–20). More recently, the dramatic effect of ionic strength on CPR domain organization was also highlighted (11,15,21). Interestingly, Huang et al. (11) demonstrated that the extent of structural changes associated with high ionic strength conditions (transition from compact to extended forms) is far more important than those detected for reduction only. This result clearly questions the level of accuracy of the actual descriptions of the extended forms, mostly being

viewed as a finite ensemble of defined structures in which the FMN domain has moved away from the FAD domain but still contains some contacts with it.

In this work, we provide a thorough structural, dynamic, and thermodynamic characterization of the soluble form of human microsomal CPR using SAXS and NMR spectroscopy under various conditions. We provide a comprehensive structural analysis of the extended (open) conformations and also describe the dynamic nature of the equilibrium between the compact and extended conformations. We demonstrate that the structural transitions seen in CPR are not rate-limiting and establish the correlation between the landscape of domain conformation and enzyme catalysis. We finally present, to our knowledge, a new picture of CPR functioning, where a rapid equilibrium between two distinct catalytically competent states controls the efficiency of electron flux from reduced nucleotides to electron acceptors.

## MATERIALS AND METHODS

### Expression and purification of CPR

For SAXS and enzymatic analysis, CPR protein was overexpressed as detailed in Aigrain et al. (7). For NMR analysis, <sup>2</sup>H-<sup>15</sup>N labeled CPR was obtained using the same protocol as described in Vincent et al. (5). Unlabeled and isotopically enriched CPRs were purified using the following protocol: His-tagged proteins were bound on a TALON Polyhistidine-Tag Purification Resin (Clontech, Mountain View, CA) equilibrated with buffer A (20 mM Tris-HCl (pH 8)) containing 0.5 M NaCl and designated as buffer B. Two washing steps were made with buffer B containing 0.01 M imidazole. A thrombin cleavage step removed the N-terminal His-tag, avoiding potential His-tag effects and facilitating the interpretation of hydrodynamic properties of the CPR. A quantity of 200 units of thrombin (>2800 NIH units/mg protein, Sigma-Aldrich, St. Louis, MO) was incubated during 2 h with the protein solution at room temperature under rotation. After cleavage, the protein was eluted with Buffer B from the TALON resin. The fractions were collected and 1 mM PMSF (phenylmethylsulfonyl fluoride) was added to stop the thrombin cleavage reaction and 1 mM DTT (dithiothreitol) to avoid the formation of disulfide bridges. CPR was fully oxidized using 1 mM ferricyanide and purified through gel filtration chromatography using a Superdex-200 (GE Healthcare, Pittsburgh, PA),

equilibrated with Buffer A, containing 1  $\mu\text{M}$  FMN, 1  $\mu\text{M}$  FAD, 1 mM DTT, and 1 mM EDTA. Purity of the sample was determined by sodium dodecyl-sulfate polyacrylamide gel electrophoresis and examination of the 280/455-nm absorbance ratio measured by optical spectroscopy. CPR samples were concentrated to 40 mg/mL ( $\sim 570 \mu\text{M}$ ) and stored at 4°C before usage.

## SAXS experiments

SAXS experiments were conducted at the Synchrotron SOLEIL facility (Saint-Aubin, France), on the SWING Beamline. All experiments were performed at 20°C. Measurements were made in Buffer A (pH 7.4 or 6.7), 1  $\mu\text{M}$  FAD and FMN and various NaCl concentrations (0, 200, 300, 400, 500, and 700 mM for pH 7.4 and 0, 400, 600, and 800 mM for pH 6.7). A series of experiments were also collected in presence of 100  $\mu\text{M}$  NADP<sup>+</sup> in buffer A (pH 7.4) 1  $\mu\text{M}$  FAD and FMN and various NaCl concentrations (0, 300, or 700 mM). Solutions were filtered and degassed before use. To obtain the highest possible quality for SAXS data, 500  $\mu\text{g}$  of CPR was injected on a Biosec3-300 column (Agilent Technologies, Santa Clara, CA) at 0.2 mL/min preequilibrated with the relevant buffer and data were collected using the combined SEC-SAXS setup for each experimental condition. Selected frames from the main elution peak were averaged and background-subtracted following the procedure reported in Pérez and Nishino (22).

## Global analysis of the SAXS curve series

The SAXS intensity curve resulting from a multipopulated solution is the weighted average of the curves from each of the individual species (23). In the case of a series of samples made of a single type of protein displaying two specific conformational states L and U, any protein-concentration normalized curve  $I_i(Q)$  from that series (where the index,  $i$ , spans the various measurements resulting in different L/U proportions) can be expressed as the linear combination of the two theoretical curves  $I_L(Q)$  and  $I_U(Q)$  corresponding to each of the two conformational states,

$$I_i(Q) = \alpha_i I_L(Q) + (1 - \alpha_i) I_U(Q), \quad (1)$$

where  $\alpha_i$  is comprised between 0 and 1 and represents the fraction of the population in the state L. In this case, the index  $i$  denotes increasing ion concentrations and  $\alpha_i$  monotonically decreases with  $i$ . Note that if the two curves  $I_L(Q)$  and  $I_U(Q)$  cross at a given  $Q_{\text{cross}}$  value (i.e.,  $I_U(Q_{\text{cross}}) = I_L(Q_{\text{cross}})$ ), then it immediately results from Eq. 1 that all  $I_i(Q)$  curves cross each other at the same  $Q_{\text{cross}}$  value, giving rise to an isoscattering point.

Alternatively, the experimental  $I_i(Q)$  curve can also be expressed as the linear combination of any two other available experimental curves  $I_j(Q)$  and  $I_k(Q)$ , such that

$$I_i(Q) = \alpha_i^{jk} I_j(Q) + (1 - \alpha_i^{jk}) I_k(Q), \quad (2)$$

where  $\alpha_i^{jk}$  represents the projection of the scattering curve  $I_i(Q)$  onto the scattering curve  $I_j(Q)$  and  $(1 - \alpha_i^{jk})$  is then the projection of the scattering curve  $I_i(Q)$  onto the scattering curve  $I_k(Q)$ . Hence, two given experimental curves  $\{I_j, I_k\}$  may form a basis to decompose all other curves using the parameters  $\alpha_i^{jk}$ , and different pairs of curves can be used as bases.

The equilibrium evolution is described by the coefficients  $\alpha_i$  in Eq. 1, but only the parameters  $\alpha_i^{jk}$  in Eq. 2 can be directly retrieved from the experimental data. However, provided that the order  $j < k$  is respected and because  $\alpha_i$  varies monotonically with  $i$ , the evolution of the  $\alpha_i^{jk}$  parameters as a function of  $i$  is an affine function of the evolution of the  $\alpha_i$  parameters, which can then be derived as follows: The coefficients  $\alpha_i^{jk}$  were retrieved using the singular value decomposition procedure applied to overdetermined systems using the data analysis software IDL (Excelis, Boulder,

CO). This was done for  $i$  spanning the increasing NaCl concentrations in each of the two series of experimental curves at pH = 6.7 and pH = 7.4 independently, and  $\{j, k\}$  standing for the following pairs of NaCl concentrations at pH = 7.4: {0 mM, 400 mM}, {0 mM, 500 mM}, {0 mM, 700 mM}, {200 mM, 500 mM}, and {200 mM, 700 mM}. For a better estimation of the parameters  $\alpha_i^{jk}$ , the curves were weighted by  $Q^2$ , to enhance the contribution of the intensity at intermediate  $Q$  values where the difference between the extreme curves is the highest. Each decomposed experimental curve  $I_i(Q)$  was checked to be conveniently reproduced by the corresponding combination of  $I_j(Q)$  and  $I_k(Q)$  curves.

For each  $\{j, k\}$  considered,  $1 - \alpha_i^{jk}$  displays a sigmoidal evolution as a function of NaCl concentration. The two series of coefficients (pH 6.7 and 7.4) were fitted independently, using an equation of the type

$$\alpha_i^{jk} = B^{jk} + T^{jk} \times \frac{e^{a^{jk} - b^{jk} \times [\text{NaCl}]_i}}{1 + e^{a^{jk} - b^{jk} \times [\text{NaCl}]_i}}, \quad (3)$$

where  $B^{jk}$  and  $T^{jk}$  represent the lower and upper values used for fitting each of the sigmoids, and  $a^{jk}$  and  $b^{jk}$  refer to the thermodynamic model used below to describe the salt-dependent L/U equilibrium. The parameters  $\alpha_i^{jk}$  were subsequently renormalized between 0 and 1 by replacing  $B^{jk}$  and  $T^{jk}$  by 0 and 1, respectively, and averaged over the different bases  $\{j, k\}$ , thus providing average values for the coefficients  $\alpha_i$  with the best possible precision. The error bars correspond to the standard deviation derived for the various  $\alpha_i^{jk}$ , obtained using the different  $\{j, k\}$  bases. The averaged coefficients  $\alpha_i$  were then fitted to the classical chemical denaturation law at pH = 6.7 and pH = 7.4 independently:

$$\bar{\alpha}_i = \frac{e^{\frac{\Delta G^w - m \times [\text{NaCl}]}{RT}}}{1 + e^{\frac{\Delta G^w - m \times [\text{NaCl}]}{RT}}}. \quad (4)$$

These averaged coefficients are related to the fraction of the U state by the relation  $p_U = 1 - \bar{\alpha}$  at each salt concentration. The SAXS curve of the U state was extrapolated for the high salt limit from the experimental curves at  $[\text{NaCl}] = 0 \text{ mM}$  and  $[\text{NaCl}] = 500 \text{ mM}$ , and from Eq. 2, resulting in

$$I_U = \frac{(1 - \bar{\alpha}_{500 \text{ mM}})I_{0 \text{ mM}} - (1 - \bar{\alpha}_{0 \text{ mM}})I_{500 \text{ mM}}}{\bar{\alpha}_{0 \text{ mM}} - \bar{\alpha}_{500 \text{ mM}}}. \quad (5)$$

Upon unfolding of the native state, the change in Gibbs free energy is classically described by the relation  $\Delta G = \Delta G^w - m \times [\text{NaCl}]$  (24), where  $\Delta G^w$  and  $m$  values are parameters describing the stability of the native state in absence of denaturant and the steepness of the transition, respectively. The midpoint transition defined as the denaturant concentration for which the unfolded and native states are equally populated is calculated as  $\Delta G^w/m$ . In this case, the equilibrium constant describing the L/U equilibrium can be expressed as

$$K_e = e^{-\frac{(\Delta G^w - m[\text{NaCl}])}{RT}}. \quad (6)$$

## Ensemble optimization method (EOM) analysis

The ensemble optimization method (EOM) is a set of programs that provide a selection of a subset of multidomain protein conformations from a randomly generated ensemble, under the constraint of a SAXS experimental curve (25). The curve resulting from the average of the selected subset curves then matches the experimental data. Ten thousand conformations of the two-domain protein CPR were first generated using the routine RANCH90 program by randomly representing the linker between the two domains, while keeping the two domains rigid. The selection of the subsets was then performed using the program GAJOE13 with 100 cycles under the constraint of the extrapolated curve of the U-state.

## NMR experiments

Samples used for NMR spectroscopy contained 500  $\mu\text{M}$   $^{15}\text{N}$ - $^2\text{H}$  labeled CPR in Buffer A (pH 7.4) and 95%/5%  $\text{H}_2\text{O}/\text{D}_2\text{O}$ . All experiments were conducted at 37°C using a 950-MHz  $^1\text{H}$  frequency Avance III spectrometer (Bruker, BioSpin, France) equipped with a cryoprobe. The backbone resonance assignment obtained at low ionic strength (5) could be easily transferred to higher ionic strengths and the  $^{15}\text{N}$  relaxation analysis was carried out as previously described in Vincent et al. (5). The NMR  $^1\text{H}$  chemical shifts were corrected from the salt-dependent HDO chemical shift variations (26).

## Kinetic experiments

Cytochrome *c* reductase activity of the CPR was measured spectrophotometrically as previously described in Aigrain et al. (21) at 20°C in Buffer A pH 7.4 or 6.7 with various concentrations of NaCl.

## RESULTS AND DISCUSSION

### SAXS experiments

Analysis of our SAXS scattering curves shows that human CPR in solution exists, as a first approximation, in a two-state equilibrium which is conditioned not only by ionic strength as shown in Huang et al. (11), Hay et al. (14), and Jenner et al. (15), but also by pH. At low ionic strength and pH 7.4, the scattering curve (Fig. 2 *a*) is well explained by a structural model derived from the closed CPR conformation (6) (Fig. 2 *a*, inset), thus confirming our previous NMR study (5) and the recent SAXS study (11).

When NaCl concentration is increased, the scattering curves gradually change (Fig. 2 *a*), presenting a steeper initial slope that indicates an increase in the population of states having larger radii of gyration ( $R_g$ ). The existence of an isoscattering point suggests a transition between two

states ((27) and Materials and Methods) that we further define as an equilibrium  $K_e$ ,

$$L \xrightleftharpoons[k_L]{k_U} U,$$

$$K_e = \frac{k_U}{k_L} = \frac{p_U}{p_L}, \quad (7)$$

$$p_U + p_L = 1,$$

between the closed conformations, thereafter referred to as the locked state (*L*) and a new state *U* (unlocked, see below), with  $k_U$  and  $k_L$  being the forward and backward rates and  $p_U$  and  $p_L$  being the populations of the *U* and *L* states, respectively.

A further analysis of the SAXS curves using a method based on global analysis of all experimental curves in the framework of chemically induced denaturation theory (24) (see Materials and Methods) allowed evaluation of  $p_U$  and  $p_L$  at each ionic strength and for both pH values. The fact that the uncertainties on the extracted populations are small in Fig. 2 *b* confirms a posteriori the two-state character of the conformational transition. In addition, the experimental curves at pH = 6.7 could be efficiently decomposed by pairs of curves obtained at pH = 7.4. This strongly suggests that the states *L* and *U* are very similar at the two pH values.  $\Delta G^w$  represents the free energy of the *L* to *U* transition in the absence of salt and  $m$  represents the dependence of free energy on denaturant concentration. The midpoint transition for which the *L* and *U* states are equally populated ( $p_L = p_U = 0.5$ ) can be estimated by  $\Delta G^w/m$  and is obtained at pH 7.4 for NaCl concentration of  $372 \pm 59$  mM. Lowering the pH to 6.7 leads to a significant perturbation

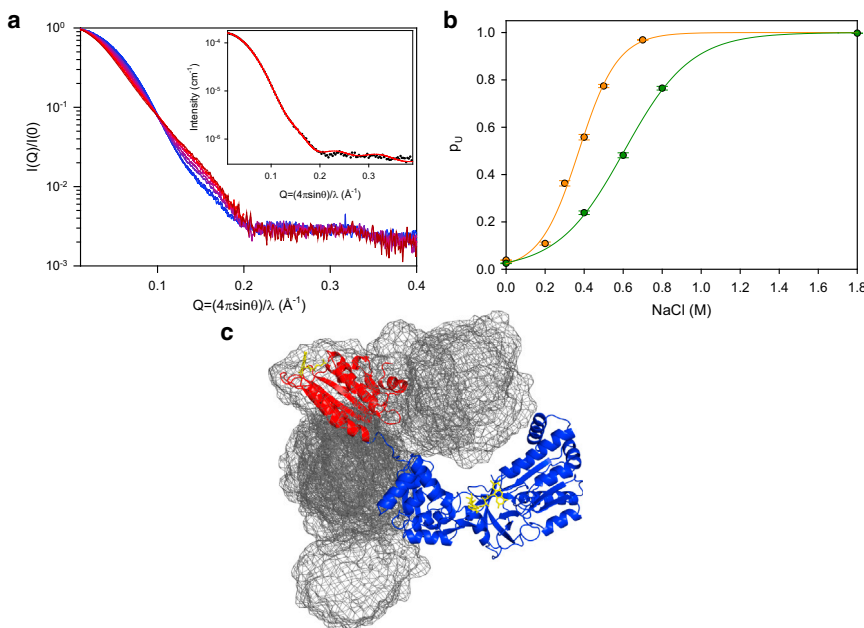

FIGURE 2 SAXS analysis of the ionic strength-mediated conformational transition of CPR. (a) Scattering curves from 0 M (blue) to 0.7 M (red) NaCl concentration at pH 7.4, normalized to protein concentration. (Dark red) Extrapolated curve at high ionic strength. (Inset) Fit of the 0 M scattering curve to the crystal structure of the closed conformation (6) with loop conformation optimization using DADIMODO software (28). (b) Fractions of the *U* state ( $p_U$ ) at pH 7.4 (orange) and pH 6.7 (green), with their respective fits to the denaturation law. (c) One of the 11 EOM-derived structures used to reproduce the scattering curve extrapolated for the *U* state is represented as ribbons (blue, FAD/connecting domain; red, FMN domain). The mesh (calculated with the MESH feature of the PYMOL software (42)) represents the van der Waals surface of the reunion of the 11 FMN domains determined by EOM. All conformations were superimposed on the FAD/connecting domain. To see this figure in color, go online.

of the equilibrium, as demonstrated by the shift of the SAXS-derived midpoint transition to  $605 \pm 35$  mM (Fig. 2 *b*). The  $\Delta G^w$  values are equal to  $9.12 \pm 0.73$  kJ·mol<sup>-1</sup> and  $8.66 \pm 0.25$  kJ·mol<sup>-1</sup> and the *m* values to  $24.46 \pm 1.91$  kJ·mol<sup>-1</sup>·M<sup>-1</sup> and  $14.30 \pm 0.41$  kJ·mol<sup>-1</sup>·M<sup>-1</sup> for pH 7.4 and 6.7, respectively. The difference between the two  $\Delta G^w$  values most likely corresponds to changes in the degree of protonation of some residues at the interface of the FMN and FAD/connecting domains. The presence of NADP<sup>+</sup> (100 μM) added to the equilibration buffer did not change any of these SAXS scattering curves when performed at pH 7.4 and at 0, 300, or 700 mM NaCl concentration (data not shown). This demonstrates that the binding of the oxidized pyridine nucleotide does not favor the L state at near-physiological pH and over a large range of ionic strength. In summary, ionic strength and pH are efficient and independent parameters controlling the L/U equilibrium.

SAXS scattering data extrapolated to high salt concentration reveal that the U state has a larger  $R_g$  value (35 Å) than the L state (26 Å) and a multimodal distance distribution, consistent with the two domains being relatively separated from each other (see Fig. S1 in the Supporting Material). Attempts to reproduce the extrapolated scattering curve (see Fig. S2 A) with a single conformation using the DADIMODO (28) algorithm were unsuccessful. Instead, using the EOM algorithm (25), the best fit was obtained with 11 structures having different relative positions and orientations for the two CPR domains (Fig. 2 *c*; and see Fig. S2 B). That a SAXS curve can be fitted by a small number of structures is a typical situation for systems with a continuous set of different conformations. This is due to the strong degeneracy of SAXS information and should not be assigned to the actual existence of a small number of exclusive populated states without further information (25). Besides, a large number of different subensembles returned by EOM results in virtually the same agreement with the experimental curve and those ensembles range from 6 to 19 individuals each. Our result just underlines that large variations of the relative orientations and positions of the two CPR domains are necessary to account for the state U, but does not provide any indication on the number of such conformations. Therefore, the SAXS data strongly suggest that the U state should be described as a large ensemble of conformations, including a large proportion of extended conformations.

## NMR experiments

To further characterize the L/U equilibrium, we collected a series of <sup>15</sup>N-TROSY NMR spectra of <sup>2</sup>H-<sup>15</sup>N labeled CPR at various NaCl concentrations at pH 7.4. The <sup>15</sup>N-TROSY spectra collected at 0 and 0.8 M NaCl concentrations, where the L and U states are respectively predominant, had similar patterns (Fig. 3 *a*), indicating that at high ionic strength the

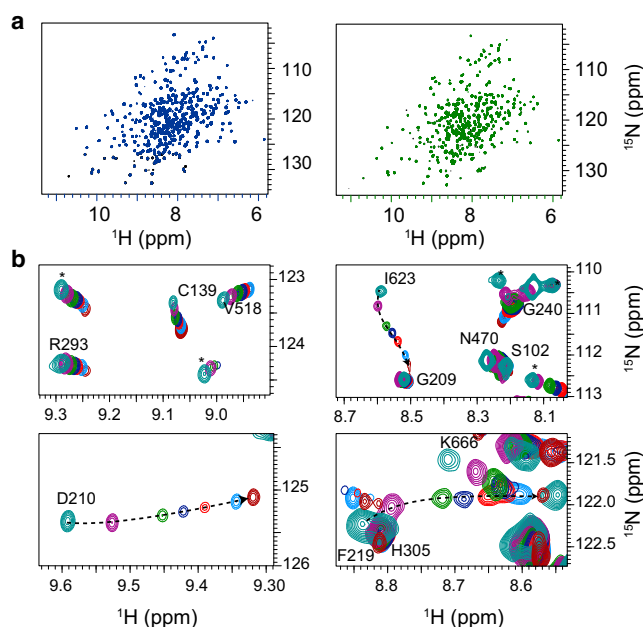

FIGURE 3 Salt-mediated conformational changes monitored by NMR. (a) <sup>15</sup>N TROSY NMR spectra collected at 0 M (blue) and at 0.8 M (green) NaCl concentrations. (b) Closeup views of selected cross-peaks from <sup>15</sup>N TROSY experiments collected from 0 M (green) to 1 M (brown) NaCl concentrations on a <sup>15</sup>N-<sup>2</sup>H labeled CPR sample. (Dotted line) Trajectories for residues D210, F219, and I623 that show large chemical shift variation in <sup>1</sup>H or <sup>15</sup>N dimension. To see this figure in color, go online.

protein is still folded and that the folds of individual domains are well conserved in the L and U states. This observation confirmed the SAXS study in that the L and U states differ by domain organization. A single <sup>1</sup>H/<sup>15</sup>N cross-peak was observed for each amide group at each salt concentration (Fig. 3 *b*), suggesting fast exchange between the different species populated during the titration. For a subset of residues, <sup>1</sup>H and <sup>15</sup>N chemical shift variations were linear when plotted against salt concentration (e.g., V158 and R293; see Fig. 3 *b*). However, most cross-peaks had more complex behavior, as visible in Fig. 3 *b*.

The vast majority of cross-peaks showed detectable peak shifts between 0 and 1 M ionic strengths and the chemical shift differences between the two salt concentrations were, on average,  $-0.031 \pm 0.053$  and  $0.08 \pm 0.28$  ppm for <sup>1</sup>H and <sup>15</sup>N nuclei, respectively, with maximal peak deviation of 0.27 ppm and 1.76 ppm, respectively (see Fig. S3 A). The relatively small chemical shift changes during titration greatly facilitated the transfer of peak assignment from low to high ionic strength conditions. This allowed us to map the chemical shift perturbation onto the CPR closed conformation (see Fig. S3 B) for 237 amino acids (110 and 119 in the FMN and FAD domains, respectively and 8 in the interdomain linker). The largest deviations were found for residues T79, G112, D210, F219, I220, and Q225 in the FMN domain, residues S243, R246, and Q247 in the interdomain linker, and residues K270, A281, D355, C366, S421, W422,

E581, I623, and G672 in the FAD/connecting domain. All these residues are present at domain surfaces or in the interdomain linker. Of interest, most of these residues are found near the interdomain interface. Chemical shifts are exquisitely sensitive to the local chemical environment, and the salt-induced domain reorganization in CPR is prone to lead to chemical shift variations, in particular for residues near the interdomain interface. However, chemical shifts also report on protein-ion interactions, which can span a wide range of affinity and may lead to chemical shift variations of similar magnitude to those observed in this experiment (29,30). Therefore, the estimations of the relative contribution of nonspecific and site-specific protein-ion interactions and conformational changes to chemical shift were rendered difficult. Nevertheless, the observation of a single cross-peak for each amino acid during the titration strongly indicated that all chemical states of the enzyme, including those characterized by distinct conformational states L and U, are rapidly interconverting in solution. As a consequence, the L/U exchange rate  $k_{\text{ex}}$  ( $= k_L + k_U$ ) must be at least  $\sim 10$  times larger than the largest difference in chemical shifts  $\Delta\nu$  between the two states, i.e.,  $k_{\text{ex}} \gg 2\pi\Delta\nu$  with  $\Delta\nu = |\nu_L - \nu_U|$ . To provide a low estimation of  $k_{\text{ex}}$ , we considered a maximal  $\Delta\nu$  value of 100 Hz ( $\sim 0.1$  ppm for the  $^1\text{H}$  nucleus at 950 MHz), which is in the high range of  $\Delta\nu$  observed on CPR, but still smaller than the largest shifts. This value is also commonly observed in the case of diamagnetic protein-protein interactions. We then calculated that the L/U exchange rate is faster than  $\sim 600 \text{ s}^{-1}$ . Because there was no evidence of line-broadening during the titration, the actual exchange rate is most likely much faster than this extreme low estimation, thus pointing to the highly dynamic nature of the L/U equilibrium.

Because chemical shift analysis did not provide any structural clue, we used  $^{15}\text{N}$  relaxation data to characterize the domain organization in the U state. Interdomain mobility can be efficiently probed by  $^{15}\text{N}$   $R_1$  and  $R_2$  relaxation rates that report on hydrodynamic properties of protein domains. For example, a rigid bidomain protein is characterized by a single rotational diffusion tensor (i.e., a single averaged correlation time  $\tau_c$ ). This was the case for CPR at 0 M ionic strength (5), in agreement with the predominant locked conformation. In contrast, when significant domain dynamics exist, each domain may experience distinct apparent correlation times, in particular when their sizes and/or shapes are different. For matter of comparison, we predicted the hydrodynamic and relaxation properties of full-length CPR and isolated FMN and FAD domains using HYDRONMR (31). For the full-length enzyme, we found averaged  $R_1$  and  $R_2$  values of  $0.26 \pm 0.01 \text{ s}^{-1}$  and  $56.7 \pm 2 \text{ s}^{-1}$ , respectively, which corresponded to an averaged  $R_2/R_1$  of  $221 \pm 16$  and correlation time of 30 ns. As already noted (5), a good correlation was found between these predictions and experimental data obtained at 0 mM NaCl concentration, in agreement with the predominantly closed conforma-

tion at low ionic strength. For the isolated FMN domain, we found averaged  $R_1$  and  $R_2$  values of  $1.2 \pm 0.02 \text{ s}^{-1}$  and  $11.8 \pm 0.3 \text{ s}^{-1}$ , respectively, which corresponded to averaged  $R_2/R_1$  of  $9.8 \pm 0.5$  and correlation time of 6 ns. For the isolated FAD domain, we found averaged  $R_1$  and  $R_2$  values of  $0.31 \pm 0.02 \text{ s}^{-1}$  and  $46.7 \pm 2.8 \text{ s}^{-1}$ , respectively, which corresponded to an averaged  $R_2/R_1$  of  $149 \pm 18$  and a correlation time of 24.2 ns.

We then collected  $^{15}\text{N}$  relaxation parameters at 800 mM salt concentrations where the U state is predominantly populated (Fig. 4 and see Table S1 in the Supporting Material). The  $^{15}\text{N}$   $R_2/R_1$  values were significantly lower for the FMN domain ( $59.8 \pm 20.0$ ) than for the FAD/connecting domain ( $181 \pm 71$ ) and corresponded to apparent correlation times of  $15.2 \pm 2.6$  and  $26.6 \pm 5.4$  ns, respectively. It is therefore apparent that the relaxation parameters obtained at 800 mM NaCl concentration are intermediate between those observed on the locked state and predicted for isolated domains. All these observations firmly suggest that in the U state, the FMN and FAD/connecting domains most likely freely tumble within a range restricted by the short linker and explore at the sub- $\tau_c$  timescale (10–30 ns) a large and most likely continuous ensemble of relative orientations and positions, in full agreement with SAXS analysis. Of note, increasing the ionic strength to 1 M (Fig. 4 and see Table S1) resulted in a small reduction in correlation times values for both domains in agreement with an increased population of the U state at higher ionic strength. We concluded that high ionic strength disrupts the interdomain interface, leading to an unlocked (U) and highly flexible state that populates conformers having the FMN moiety exposed to solvent, and is therefore compatible with interaction with other solutes.

## Kinetic experiments

The influence of the L/U equilibrium on electron flux was also assessed by measuring spectrophotometrically the cytochrome *c* reduction, in the same buffer conditions as those used for the SAXS experiments (Fig. 5 a). At pH 7.4 and 6.7, the initial rates ( $k_{\text{obs}}$ ) of cytochrome *c* reduction display a bell-shaped curve when plotted against ionic strength, as previously observed in Sem and Kasper (19).

The striking correlation between maximal CPR activity (Fig. 5 a, red and blue dots) and SAXS-derived midpoint conformational transitions (Fig. 5 a, dashed lines indicating  $p_U = 0.5$ ) at both pH values unambiguously demonstrates that, under steady-state conditions, electron flux is controlled by the L/U equilibrium observed for the oxidized enzyme at the resting state. More particularly, maximal electron flux occurs when  $K_e$  is close to 1, i.e., when the two conformational states are almost equally populated. The link between the proportion of the U state and cytochrome *c* reduction rate has already been reported in Huang et al. (11) using a SAXS-derived  $D_{\text{max}}$  value as a rough

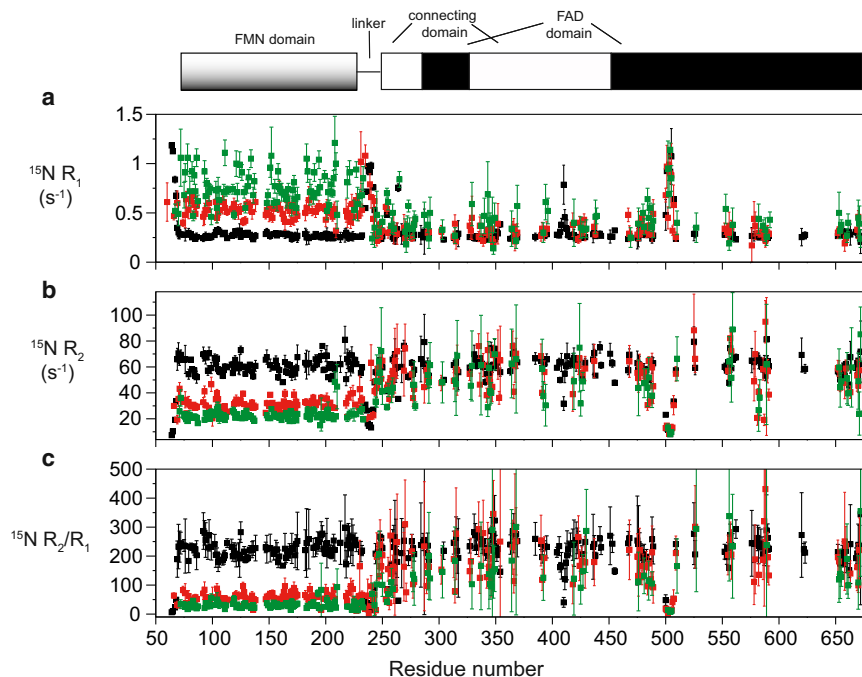

FIGURE 4 NMR  $^{15}\text{N}$  relaxation data collected at 950 MHz  $^1\text{H}$  frequency at  $T = 310\text{ K}$  and at various ionic strengths. (a–c)  $^{15}\text{N}$   $R_1$ ,  $R_2$ , and  $R_2/R_1$  values, respectively. (Red squares) Relaxation data collected at 0.8 M and (green squares) 1 M NaCl concentrations. To facilitate the comparison with relaxation obtained at low ionic strength, we also represented the data measured previously at 0 M ionic strength (black) (5). (Top) The domain organization illustrates the linear localization of the FMN-domain, the linker region, and the intertwined FAD and connecting domains. To see this figure in color, go online.

estimate of the population of the extended forms and for a limited salt concentration range (0–0.54 M). Here we also observed the similar linear relationship between reduction rate and  $p_U$  at low salt concentration (<400 mM), but the increase of salt concentration to higher concentration (1.8 M in our case) allowed us to detect the full transition. Therefore, our data demonstrate that maximal electron flux to external acceptors occurs when the conformational equilibrium of CPR is adequately balanced.

To rationalize these observations, we adapted and evaluated a kinetic scheme initially set up for NOS (Fig. 5 b, and see Section S1 in the Supporting Material (32,33)). In this model, the L state supports the NADPH-based FAD-mediated FMN reduction ( $k_1$ ) whereas the U state supports the cytochrome *c* reduction ( $k_2$ ). Although this model aggregates the different chemical steps occurring in the L state (hydride transfer from NADPH to FAD, ET from FAD to FMN, and the association and dissociation steps of the nucleotides) in a single rate constant ( $k_1$ ), this simplification can serve as a first approximation of the real CPR mechanism. Here we further consider  $K_e$  independent of the CPR oxidation state. This hypothesis is supported by the limited impact of CPR reduction on SAXS-derived pairwise distance distribution (11). In addition, the NADPH-based reduction has a relatively weak effect on the  $R_g$  values of CPR (<3 Å) (11) compared to the  $R_g$  difference between the L and U states described in our work (9 Å). We provide in the Supporting Material an in-depth computational analysis of the kinetic model. Notably we found that the shape of the enzymatic turnover  $k_{\text{obs}}$  versus L/U relative populations depends on whether conformational changes are faster or slower than chemical rates, i.e.,  $k_U, k_L \gg k_1, k_2$  or  $k_U,$

$k_L \ll k_1, k_2$ . If one assumes fast conformational changes, the model predicts a bell-shape curve when plotting  $k_{\text{obs}}$  versus  $p_U$  or  $p_L$ . Our NMR study demonstrated that the L/U exchange rate  $k_{\text{ex}} = k_U + k_L$  is much faster than  $\sim 600\text{ s}^{-1}$ , a value that is higher than  $k_1$  and  $k_2$  rates previously measured (2). This further supports the idea that conformational changes may not be rate-limiting. This result sharply contrasts with previous assumptions for NOS (32–34). Under these conditions, catalysis proceeds through the exploration of a multidimensional free-energy landscape (35) (Fig. 5 b) in which fast domain dynamics and slow reaction rates are coupled. The model predicts that maximal activity is achieved for

$$K_e = \frac{k_U}{k_L} = \sqrt{\frac{k_1}{k_2}} \quad (8)$$

(see also the Supporting Material). Here, the optimal CPR electron flux is effectively observed when  $K_e$  is close to unity (Fig. 5 a), in good agreement with the fact that reported values for  $k_1$  and  $k_2$  are in a similar range (2). Even though the model combines multiple elementary steps into single  $k_1$  and  $k_2$  rate constants, the global shape of the experimental  $k_{\text{obs}}$  curve (Fig. 5 a, plain blue and red lines) is satisfactorily reproduced using the SAXS-derived  $p_L/p_U$  values calculated with the denaturation-type equation parameters and  $k_1/k_2$  simulated values of 250/220  $\text{s}^{-1}$  and 180/165  $\text{s}^{-1}$  at pH 7.4 and 6.7, respectively (Fig. 5 a, and see Section S1 and Eq. S9 in the Supporting Material). These predicted reduction rates are of the order of magnitude classically described for CPR (2). Additional salt-dependent factors might reflect the deviation of the simulated curve at high

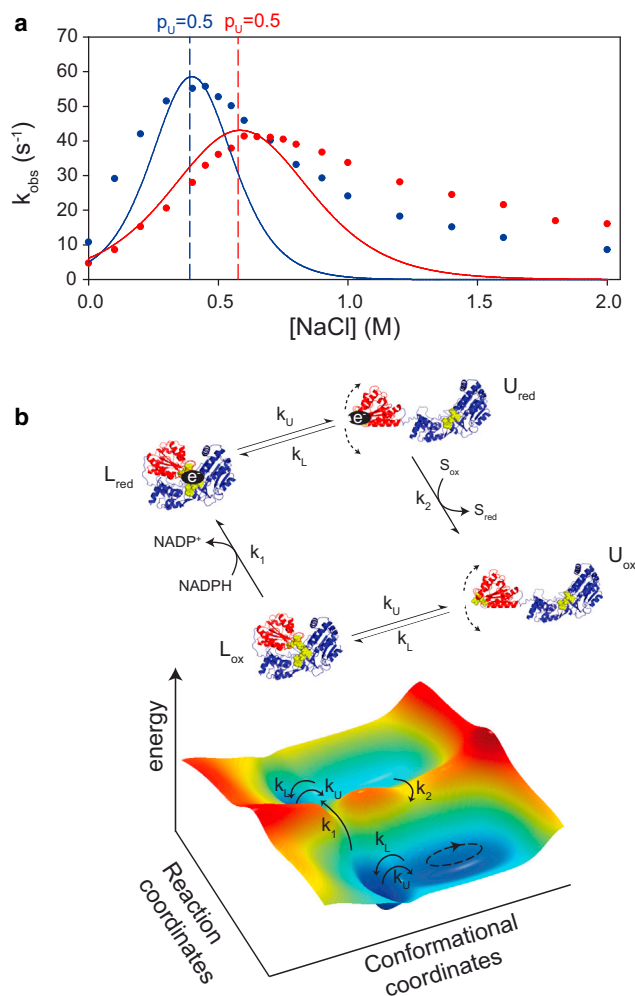

FIGURE 5 Linking conformational equilibrium and catalytic efficiency. (a) Cytochrome *c* reduction initial rate  $k_{\text{obs}}$  versus NaCl concentration measured at pH 7.4 (blue) and 6.7 (red). (Lines) The  $k_{\text{obs}}$  values fitted from the equation derived from the kinetic scheme in (b). (b) Kinetic scheme coupling conformational transitions and reaction rates  $k_1$  and  $k_2$ . (ox) Oxidized; (red) reduced; (S) final electron acceptor. (Blue) FAD/connecting domain; (red) FMN domain. The corresponding multidimensional energy landscape is shown below. To see this figure in color, go online.

ionic strength, or alternative kinetic mechanisms may be predominant at high ionic strength. Taken together, these results suggest that the L and U states characterized in the absence of ET are fully relevant to describe the conformational equilibrium adopted by CPR during catalysis and that the relative populations of the two fast-exchanging conformational states directly control the efficiency of electron flux. Of note, this mechanism does not exclude possible additional conformational changes that may occur during the chemical steps  $k_1$  and  $k_2$ .

## CONCLUSIONS

In this article, we describe the free energy landscape of CPR in solution as a conformational equilibrium between a

locked state (L), characterized by a closed rigid conformation, and a novel unlocked state (U), characterized by a large set of conformations. The structural transitions allowing the L/U switch have a relatively low energy barrier revealing the highly dynamic nature of domain conformational sampling in CPR. We further show that the free energy landscape is not modified upon  $\text{NADP}^+$  binding, contrarily to previously published results (10,13). In contrast, it can be efficiently reshaped not only by ionic strength, as already described in Huang et al. (11), Jenner et al. (15), Aigrain et al. (21), and Haque et al. (32), but also by pH. The largely nonphysiological conditions investigated here were used to accurately estimate the relative proportions of the L and U states under various ionic strength and pH conditions. The observation and analysis of a conformational equilibrium under multiple conditions allowed here the direct estimation of substate populations, including at near physiological conditions (pH 7.4 and 150 mM [NaCl]). This approach can therefore advantageously complement other attempts based on combined analysis of computation-based simulations and SAXS or NMR measurements obtained under a single condition (36–39).

The influence of electrostatics in controlling ET from CPR to acceptors has been extensively studied (reviewed in Pudney et al. (13)). In previous reports, electrostatic effects on acceptors' reduction rates were interpreted as direct consequences of the changes in the interactions between CPR and acceptors (20,40,41). Here, the salt-dependency of electron flux to acceptors is proposed to predominantly stem from the ionic strength-dependent preexisting L/U equilibrium. We also provide a kinetic mechanism stipulating that the conformational state of CPR may not be significantly altered by the oxidation/reduction cycle. Such a mechanism sharply contrasts with the commonly accepted model for CPR (11), which assumes that the progress along the reaction coordinates is associated with stepwise conformational changes, starting the cycle with the L state (nucleotide binding, FAD reduction, and interflavin ET) and pursuing the reaction with discrete extended conformations (ET to acceptors). In the mechanism we propose here, CPR populates the L and U states several times before productive chemical steps ( $k_1$  and  $k_2$ ). Indeed, the global catalytic rate  $k_{\text{obs}}$  depends on conformational equilibrium parameters ( $p_U$ ,  $p_L$ ,  $k_U$ , and  $k_L$ ) and on chemical rate constants ( $k_1$  and  $k_2$ ) that aggregate all kinetic parameters related to intrinsic properties of the enzyme (redox potentials, intradomain electron/proton transfer rates) or thermodynamic parameters (on- and off-rates for substrate/product binding or intermolecular ET).

The existence of multiple conformations exposing the FMN cofactor to the solvent in the U state provides, to our knowledge, a new template to apprehend CPR functioning. In the U state, domains movements are only restricted by natural obstacles (membrane, other domains, acceptors, etc.). The various discrete and extended



conformations reported by other groups (10,11,13,15) may not be compatible with CPR-acceptor complexes due to steric hindrance of the endoplasmic reticulum surface with the N-terminal membrane spanning domain and the following FMN domain. In contrast, if we apply the ensemble of conformations from the U state to full-length CPR, the FAD domain can explore the many structural conformations leading to complexes compatible with ET to acceptors. A putative ET-to-acceptor state has recently been described with the x-ray structure of a complex between a mutated CPR and heme oxygenase (16). The intrinsic domain flexibility in reduced CPR may therefore facilitate the search for optimal interaction with the acceptor before the external ET. Our description of the CPR mechanism may be generalizable to other bidomain diflavin reductases for which the electron flux could be optimal when the populations of the L and U states match the  $k_1/k_2$  value (see Eq. 8), or, written differently, when the state corresponding to the slowest reaction is favored. Hence, ionic strength or pH and more generally physico-chemical parameters can directly tune overall electron flux not only through modulating chemical rates but also by controlling the stability of the interface of the two domains and the conformational equilibrium. Genetic or post-translational changes of the residues at the interface are other potential mechanisms that may impact the overall activity without necessarily affecting other kinetic parameters (6,11,21,32). The kinetic mechanism we provide here can also possibly apply to other multidomain enzymes: an ultrafast conformational exchange at each catalytic step between competent states characterized by rapid stochastic interdomain interactions and the short lifetime of domain interfaces can control the global enzymatic output. In such a situation, maximal efficiency of the enzyme would be obtained when the relative populations of productive conformations adequately match individual catalytic rates. By rapidly sampling active conformations, extensive enzyme dynamics may therefore provide an elegant solution to the requirement of enzymes to adopt distinct conformations during catalysis.

## SUPPORTING MATERIAL

Supporting Materials and Methods, two schemes, four figures, and one table are available at [http://www.biophysj.org/biophysj/supplemental/S0006-3495\(15\)00126-5](http://www.biophysj.org/biophysj/supplemental/S0006-3495(15)00126-5).

## AUTHOR CONTRIBUTIONS

O.F. and F.F. purified proteins and collected SAXS and enzymatic data. J.P., E.L., and G.T. designed SAXS and enzymatic experiments. O.F., F.F., and J.P. collected SAXS data. J.P. and G.T. analyzed SAXS data. E.L. designed NMR experiments and analyzed kinetic schemes. O.F. and E.L. performed and analyzed NMR experiments. E.G., C.S., and D.P. participated in early stages of the project and commented on the manuscript. G.T., E.L., and J.P. wrote the manuscript.

## ACKNOWLEDGMENTS

This work was supported by a PhD grant from the Institut de Chimie de Substances Naturelles to O.F.

## REFERENCES

- Hannemann, F., A. Bichet, ..., R. Bernhardt. 2007. Cytochrome P450 systems—biological variations of electron transport chains. *Biochim. Biophys. Acta.* 1770:330–344.
- Muratliev, M. B., R. Feyereisen, and F. A. Walker. 2004. Electron transfer by diflavin reductases. *Biochim. Biophys. Acta.* 1698:1–26.
- Wang, M., D. L. Roberts, ..., J. J. Kim. 1997. Three-dimensional structure of NADPH-cytochrome P450 reductase: prototype for FMN- and FAD-containing enzymes. *Proc. Natl. Acad. Sci. USA.* 94:8411–8416.
- Lamb, D. C., Y. Kim, ..., L. M. Podust. 2006. A second FMN binding site in yeast NADPH-cytochrome P450 reductase suggests a mechanism of electron transfer by diflavin reductases. *Structure.* 14:51–61.
- Vincent, B., N. Morellet, ..., E. Lescop. 2012. The closed and compact domain organization of the 70-kDa human cytochrome P450 reductase in its oxidized state as revealed by NMR. *J. Mol. Biol.* 420:296–309.
- Xia, C., S. P. Panda, ..., J. J. Kim. 2011. Structural basis for human NADPH-cytochrome P450 oxidoreductase deficiency. *Proc. Natl. Acad. Sci. USA.* 108:13486–13491.
- Aigrain, L., D. Pompon, ..., G. Truan. 2009. Structure of the open conformation of a functional chimeric NADPH cytochrome P450 reductase. *EMBO Rep.* 10:742–747.
- Hamdane, D., C. Xia, ..., L. Waskell. 2009. Structure and function of an NADPH-cytochrome P450 oxidoreductase in an open conformation capable of reducing cytochrome P450. *J. Biol. Chem.* 284:11374–11384.
- Aigrain, L., F. Fatemi, ..., G. Truan. 2012. Dynamic control of electron transfers in diflavin reductases. *Int. J. Mol. Sci.* 13:15012–15041.
- Ellis, J., A. Gutierrez, ..., G. C. Roberts. 2009. Domain motion in cytochrome P450 reductase: conformational equilibria revealed by NMR and small-angle x-ray scattering. *J. Biol. Chem.* 284:36628–36637.
- Huang, W. C., J. Ellis, ..., G. C. Roberts. 2013. Redox-linked domain movements in the catalytic cycle of cytochrome p450 reductase. *Structure.* 21:1581–1589.
- Wadsäter, M., T. Laursen, ..., M. Cárdenas. 2012. Monitoring shifts in the conformational equilibrium of the membrane protein cytochrome P450 reductase (POR) in nanodiscs. *J. Biol. Chem.* 287:34596–34603.
- Pudney, C. R., B. Khara, ..., N. S. Scrutton. 2011. Coupled motions direct electrons along human microsomal P450 Chains. *PLoS Biol.* 9:e1001222.
- Hay, S., S. Brenner, ..., N. S. Scrutton. 2010. Nature of the energy landscape for gated electron transfer in a dynamic redox protein. *J. Am. Chem. Soc.* 132:9738–9745.
- Jenner, M., J. Ellis, ..., N. J. Oldham. 2011. Detection of a protein conformational equilibrium by electrospray ionization-ion mobility-mass spectrometry. *Angew. Chem. Int. Ed. Engl.* 50:8291–8294.
- Sugishima, M., H. Sato, ..., M. Noguchi. 2014. Structural basis for the electron transfer from an open form of NADPH-cytochrome P450 oxidoreductase to heme oxygenase. *Proc. Natl. Acad. Sci. USA.* 111:2524–2529.
- Laursen, T., K. Jensen, and B. L. Møller. 2011. Conformational changes of the NADPH-dependent cytochrome P450 reductase in the course of electron transfer to cytochromes P450. *Biochim. Biophys. Acta.* 1814:132–138.
- Laursen, T., A. Singha, ..., N. S. Hatzakis. 2014. Single molecule activity measurements of cytochrome p450 oxidoreductase reveal the existence of two discrete functional states. *ACS Chem. Biol.* 30:79–93.
- Sem, D. S., and C. B. Kasper. 1995. Effect of ionic strength on the kinetic mechanism and relative rate limitation of steps in the model

- NADPH-cytochrome P450 oxidoreductase reaction with cytochrome *c*. *Biochemistry*. 34:12768–12774.
20. Shen, A. L., and C. B. Kasper. 1995. Role of acidic residues in the interaction of NADPH-cytochrome P450 oxidoreductase with cytochrome P450 and cytochrome *c*. *J. Biol. Chem.* 270:27475–27480.
  21. Aigrain, L., D. Pompon, and G. Truan. 2011. Role of the interface between the FMN and FAD domains in the control of redox potential and electronic transfer of NADPH-cytochrome P450 reductase. *Biochem. J.* 435:197–206.
  22. Pérez, J., and Y. Nishino. 2012. Advances in x-ray scattering: from solution SAXS to achievements with coherent beams. *Curr. Opin. Struct. Biol.* 22:670–678.
  23. Koch, M. H., P. Vachette, and D. I. Svergun. 2003. Small-angle scattering: a view on the properties, structures and structural changes of biological macromolecules in solution. *Q. Rev. Biophys.* 36:147–227.
  24. Greene, Jr., R. F., and C. N. Pace. 1974. Urea and guanidine hydrochloride denaturation of ribonuclease, lysozyme,  $\alpha$ -chymotrypsin, and  $\beta$ -lactoglobulin. *J. Biol. Chem.* 249:5388–5393.
  25. Bernadó, P., E. Mylonas, ..., D. I. Svergun. 2007. Structural characterization of flexible proteins using small-angle x-ray scattering. *J. Am. Chem. Soc.* 129:5656–5664.
  26. Wishart, D. S., C. G. Bigam, ..., B. D. Sykes. 1995.  $^1\text{H}$ ,  $^{13}\text{C}$  and  $^{15}\text{N}$  chemical shift referencing in biomolecular NMR. *J. Biomol. NMR.* 6:135–140.
  27. Kler, S., R. Asor, ..., U. Raviv. 2012. RNA encapsidation by SV40-derived nanoparticles follows a rapid two-state mechanism. *J. Am. Chem. Soc.* 134:8823–8830.
  28. Evrard, G., F. Mareuil, ..., J. Pérez. 2011. DADIMODO: a program for refining the structure of multidomain proteins and complexes against small-angle scattering data and NMR-derived restraints. *J. Appl. Cryst.* 44:1264–1271.
  29. Tyler, R. C., J. C. Wieting, ..., B. F. Volkman. 2012. Electrostatic optimization of the conformational energy landscape in a metamorphic protein. *Biochemistry*. 51:9067–9075.
  30. Rembert, K. B., J. Paterová, ..., P. S. Cremer. 2012. Molecular mechanisms of ion-specific effects on proteins. *J. Am. Chem. Soc.* 134:10039–10046.
  31. García de la Torre, J., M. L. Huertas, and B. Carrasco. 2000. HYDRONMR: prediction of NMR relaxation of globular proteins from atomic-level structures and hydrodynamic calculations. *J. Magn. Reson.* 147:138–146.
  32. Haque, M. M., M. Bayachou, ..., D. J. Stuehr. 2013. Charge-pairing interactions control the conformational setpoint and motions of the FMN domain in neuronal nitric oxide synthase. *Biochem. J.* 450:607–617.
  33. Haque, M. M., C. Kenney, ..., D. J. Stuehr. 2011. A kinetic model linking protein conformational motions, interflavin electron transfer and electron flux through a dual-flavin enzyme—simulating the reductase activity of the endothelial and neuronal nitric oxide synthase flavoprotein domains. *FEBS J.* 278:4055–4069.
  34. Stuehr, D. J., J. Tejero, and M. M. Haque. 2009. Structural and mechanistic aspects of flavoproteins: electron transfer through the nitric oxide synthase flavoprotein domain. *FEBS J.* 276:3959–3974.
  35. Benkovic, S. J., G. G. Hammes, and S. Hammes-Schiffer. 2008. Free-energy landscape of enzyme catalysis. *Biochemistry*. 47:3317–3321.
  36. Bertini, I., A. Giachetti, ..., D. I. Svergun. 2010. Conformational space of flexible biological macromolecules from average data. *J. Am. Chem. Soc.* 132:13553–13558.
  37. Huang, J. R., L. R. Warner, ..., M. Blackledge. 2014. Transient electrostatic interactions dominate the conformational equilibrium sampled by multidomain splicing factor U2AF65: a combined NMR and SAXS study. *J. Am. Chem. Soc.* 136:7068–7076.
  38. Berlin, K., C. A. Castañeda, ..., D. Fushman. 2013. Recovering a representative conformational ensemble from underdetermined macromolecular structural data. *J. Am. Chem. Soc.* 135:16595–16609.
  39. Deshmukh, L., C. D. Schwieters, ..., G. M. Clore. 2013. Structure and dynamics of full-length HIV-1 capsid protein in solution. *J. Am. Chem. Soc.* 135:16133–16147.
  40. Voznesensky, A. I., and J. B. Schenkman. 1994. Quantitative analyses of electrostatic interactions between NADPH-cytochrome P450 reductase and cytochrome P450 enzymes. *J. Biol. Chem.* 269:15724–15731.
  41. Nisimoto, Y., and D. E. Edmondson. 1992. Effect of KCl on the interactions between NADPH:cytochrome P-450 reductase and either cytochrome *c*, cytochrome *b*<sub>5</sub> or cytochrome P-450 in octyl glucoside micelles. *Eur. J. Biochem.* 204:1075–1082.
  42. Schrödinger LLC 2010. The PYMOL Molecular Graphics System, Ver. 1.740. Schrödinger, New York.

## SUPPORTING MATERIAL

### SUPPLEMENTARY TEXT S1

Here we explore the kinetic scheme adapted from references (1, 2) and represented in Fig. 4b of the main manuscript. We reproduced it below for clarity. This scheme is based on the requirement for an enzyme to adopt two mutually conformations to achieve two distinct steps during catalysis. When adapted to the CPR, the NADPH-based FAD-mediated reduction of FMN is supposed to occur in the locked state (L) where the two flavins are in short distance whereas the external electron transfer (ET) to the final substrate is supposed to occur in the unlocked state (U) where the FMN is exposed to solvent.

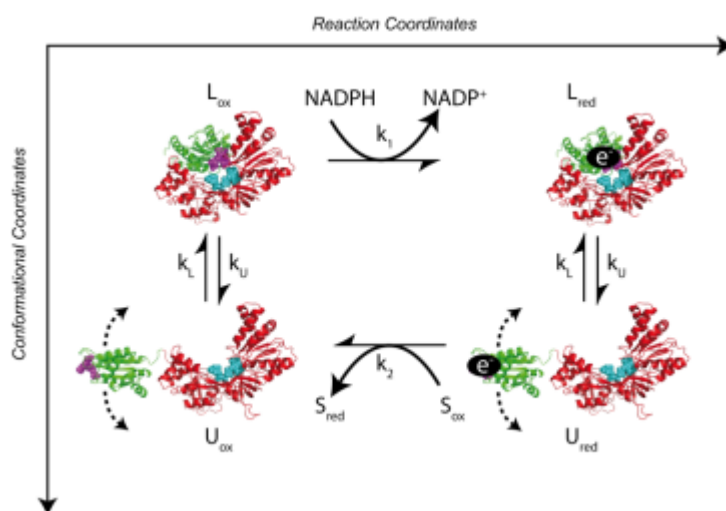

Kinetic scheme linking two conformational states of CPR and their respective catalytic steps where the conformational equilibrium is not altered by chemical transformations.

In this model, the enzyme is assumed to sample the locked (L) and unlocked (U) conformational states with closure ( $k_L$ ) and opening ( $k_U$ ) rates that are insensitive to the protein oxidation state. The equilibrium constant  $K_e$  is defined as  $k_U / k_L = p_U / p_L$  where  $p_U$  and  $p_L$  are the relative populations of the unlocked and locked states, respectively ( $p_U + p_L = 1$ ). All other chemical events, including substrate binding, chemical transformations and product release are incorporated into the  $k_1$  and  $k_2$  rates that describe the CPR reduction/oxidation cycle. The  $k_1$  rate constant describes the NADPH binding step to the oxidized locked conformation (L<sub>ox</sub>), the hydride transfer from NADPH to FAD, the release of NADP<sup>+</sup>, and the interflavin electron transfer, resulting in the reduced locked state (L<sub>red</sub>) and the oxidized NADP<sup>+</sup>. The  $k_2$  rate constant describes the binding of the oxidized substrate (S<sub>ox</sub>) to the FMN-reduced unlocked conformation (U<sub>red</sub>), the intermolecular ET and the release of the reduced substrate (S<sub>red</sub>). Importantly, this mechanism does not exclude possible additional conformation changes that may occur during the chemical steps  $k_1$  and  $k_2$ , such as local rearrangements or even domain reorientations, the only requirement being that domain relative orientations are preserved prior to and after chemical events.

In the following we provide the detailed calculation of the enzymatic turnover  $k_{obs}$ , defined as the number of substrate molecules formed by unit of time by a single CPR molecule, following the abovementioned kinetic scheme. The relationship between the enzymatic turnover, the rate of formation of the product (reduced substrate such as cytochrome *c*), and the total enzyme concentration  $E_T$  is as follows:

$$k_{obs} = \frac{1}{E_T} \frac{d[S_{red}]}{dt} \quad (\text{Eq. 1})$$

In order to establish the relationship between  $d[S_{red}]/dt$  and the kinetic parameters, we derive the following differential equations from the kinetic scheme:

$$\begin{aligned} \frac{d[U_{ox}]}{dt} &= -k_L[U_{ox}] + k_U[L_{ox}] + k_2[U_{red}] & (a) \\ \frac{d[L_{ox}]}{dt} &= k_L[U_{ox}] - (k_U + k_1[L_{ox}]) & (b) \\ \frac{d[L_{red}]}{dt} &= k_1[L_{ox}] + k_L[U_{red}] - k_U[L_{red}] & (c) \\ \frac{d[U_{red}]}{dt} &= k_U[L_{red}] - (k_L + k_2[U_{red}]) & (d) \end{aligned} \quad (\text{Eq. 2})$$

Under stationary conditions, the time-dependent derivatives vanish and the relationships between the steady-state concentrations of the various species can be determined to:

$$\begin{aligned} [U_{ox}] &= \frac{(k_U + k_1)k_2}{k_L k_1} [U_{red}] & (a) \\ [L_{ox}] &= \frac{k_2}{k_1} [U_{red}] & (b) \\ [L_{red}] &= \frac{(k_L + k_2)}{k_U} [U_{red}] & (c) \end{aligned} \quad (\text{Eq. 3})$$

Reminding that the total concentration of the enzyme  $[E_T]$  is constant, we obtain:

$$E_T = [U_{ox}] + [L_{ox}] + [L_{red}] + [U_{red}] \quad (\text{Eq. 4})$$

By combining Eq. 3 and Eq. 4, we derive the rate of formation of the reduced substrate:

$$\frac{d[S_{red}]}{dt} = k_2[U_{red}] = \frac{k_U k_L}{(k_U + k_L)} \frac{k_1 k_2 [E_T]}{(k_U k_2 + k_1 k_2 + k_L k_1)} \quad (\text{Eq. 5})$$

The relative populations  $p_U$  and  $p_L$  are dependent on  $K_e$  and  $k_U$  and  $k_L$  parameters according to the equations:

$$p_U = 1 - p_L = \frac{K_e}{1 + K_e} = \frac{k_U}{k_U + k_L} \quad (\text{Eq. 6})$$

which enables us to derive the final equation for the turnover:

$$k_{obs} = \frac{p_U p_L (k_U + k_L)}{\left(1 + \frac{k_U}{k_1} + \frac{k_L}{k_2}\right)} \quad (\text{Eq. 7})$$

In this equation, we recognize the term  $P = p_U p_L = p_U (1 - p_U)$  that has a parabolic shape when  $P$  is plotted versus  $p_U$ . Under the assumption that the conformational exchange occurs on a

slower timescale than enzymatic events (i.e.  $k_1 \gg k_U$  and  $k_2 \gg k_L$ ), the Eq. 7 can be simplified to:

$$k_{obs} = p_U p_L (k_U + k_L) \quad (\text{Eq. 8})$$

Under such conditions, the turnover is only controlled by the parameters  $k_U$  and  $k_L$  that define the conformational transition (i.e. rates and populations) and that are the rate-limiting steps. Notably the turnover does not depend on the  $k_1$  and  $k_2$  rates. In general this equation does not display a bell-shape behavior when  $k_{obs}$  is plotted versus  $k_U$  or  $k_L$ , unless the sum  $k_U + k_L$  is kept constant as proposed in (2). However this is a strong requirement on the physico-chemical properties of the system because all parameters  $k_U$ ,  $k_L$  and  $p_U$ ,  $p_L$  are intimately linked.

On the other hand, assuming that conformational exchange is faster than chemical events (i.e.  $k_U \gg k_1$  and  $k_L \gg k_2$ ), the turnover simplifies to:

$$k_{obs} = \frac{p_U p_L (k_U + k_L)}{\left( \frac{k_U}{k_L} + \frac{k_L}{k_2} \right)} \quad (\text{Eq. 9})$$

In addition, if the condition  $k = k_1 = k_2$  is fulfilled, the turnover  $k_{obs}$  can be expressed as a simple form:

$$k_{obs} = p_U p_L k \quad (\text{Eq. 10})$$

In this case, a perfectly symmetric bell-shape curve is obtained for  $k_{obs} = f(p_U)$  with maximum activity for  $p_U = p_L = 0.5$  (next figure, panel D), i.e. for  $K_e = 1$ . In the general case where  $k_2 \neq k_1$ , an asymmetric bell-shape curve is obtained and the relative populations for maximum activity depends on  $k_1$  and  $k_2$  rates (next figure, panels A-C). Based on Eq. 9, the maximum activity is obtained for

$$K_e = \sqrt{\frac{k_1}{k_2}} \quad (\text{Eq. 11})$$

and is predicted to be:

$$(k_{obs})_{max} = \frac{k_1 k_2}{\left( \sqrt{k_1} + \sqrt{k_2} \right)^2} \quad (\text{Eq. 12})$$

Therefore, for instance, slower  $k_1$  rate (FMN reduction rate) and faster  $k_2$  rate (external ET) can be compensated by increasing proportion of the locked state that is competent for FMN reduction. The main conclusion drawn from this analysis is that the assumption of fast conformational exchange results in a turnover rate of symmetric or asymmetric bell-shape curve when plotted against populations without additional constraint and that maximal activity can be obtained for a well-balanced proportion of the two conformations that are active at distinct steps of catalysis.

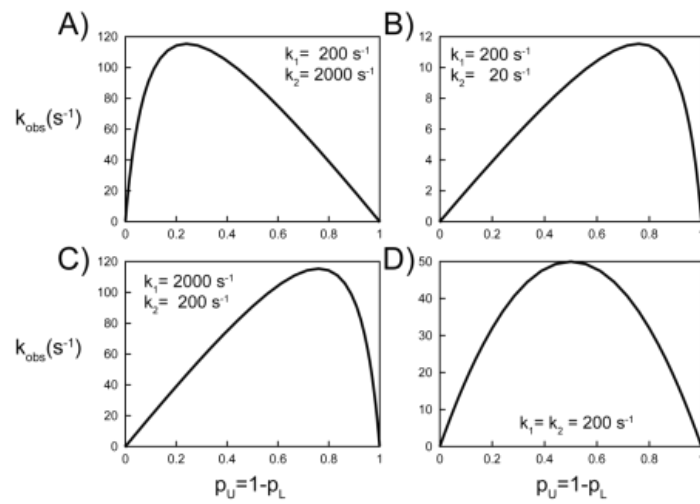

Simulation of  $k_{\text{obs}}$  using Eq. 9. Different combinations of  $k_1$  and  $k_2$  were used to generate the curves in panels A-B-C-D.

FIGURE S1

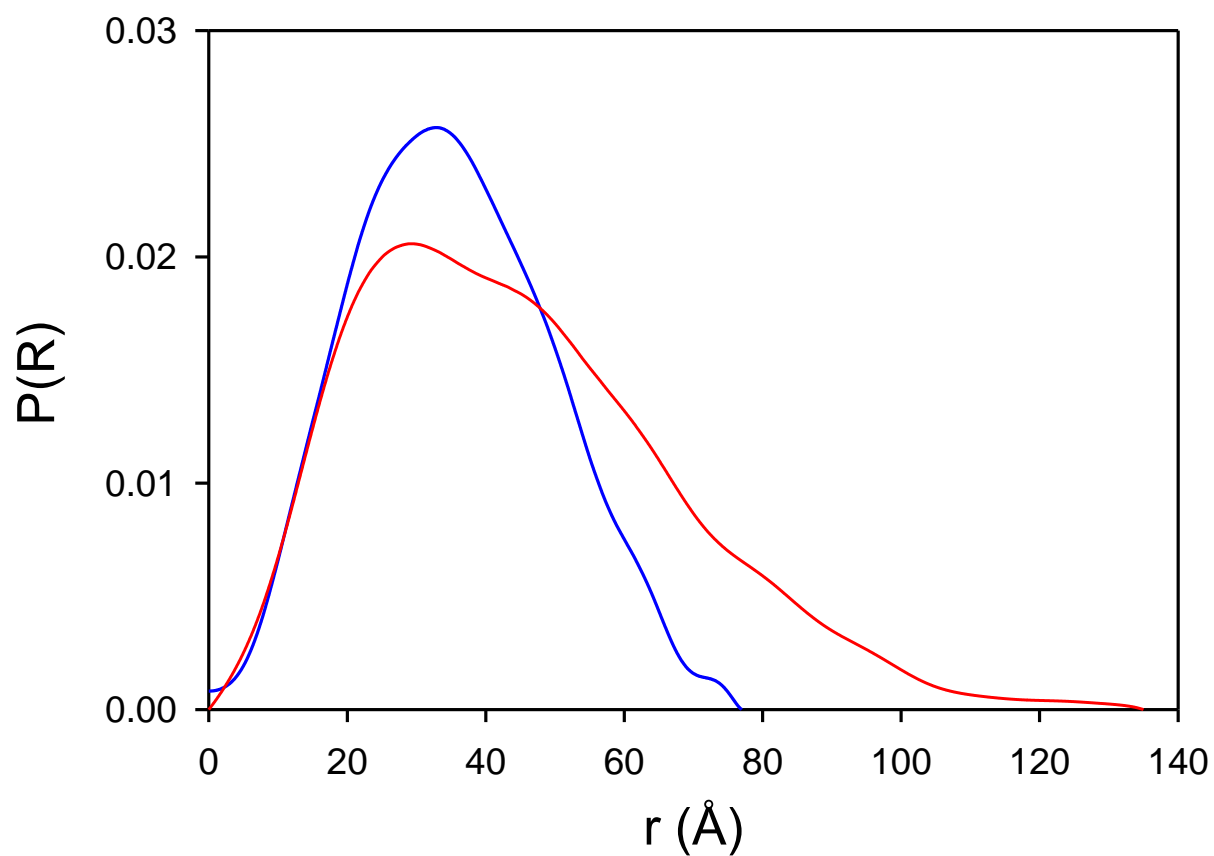

**Distance distribution of human CPR observed at low and extrapolated to the higher ionic strength at pH 7.4.** Pair distance distribution functions  $P(R)$  were calculated from extrapolated SAXS curves at 0 (blue) or infinite (red) ionic strength.

FIGURE S2

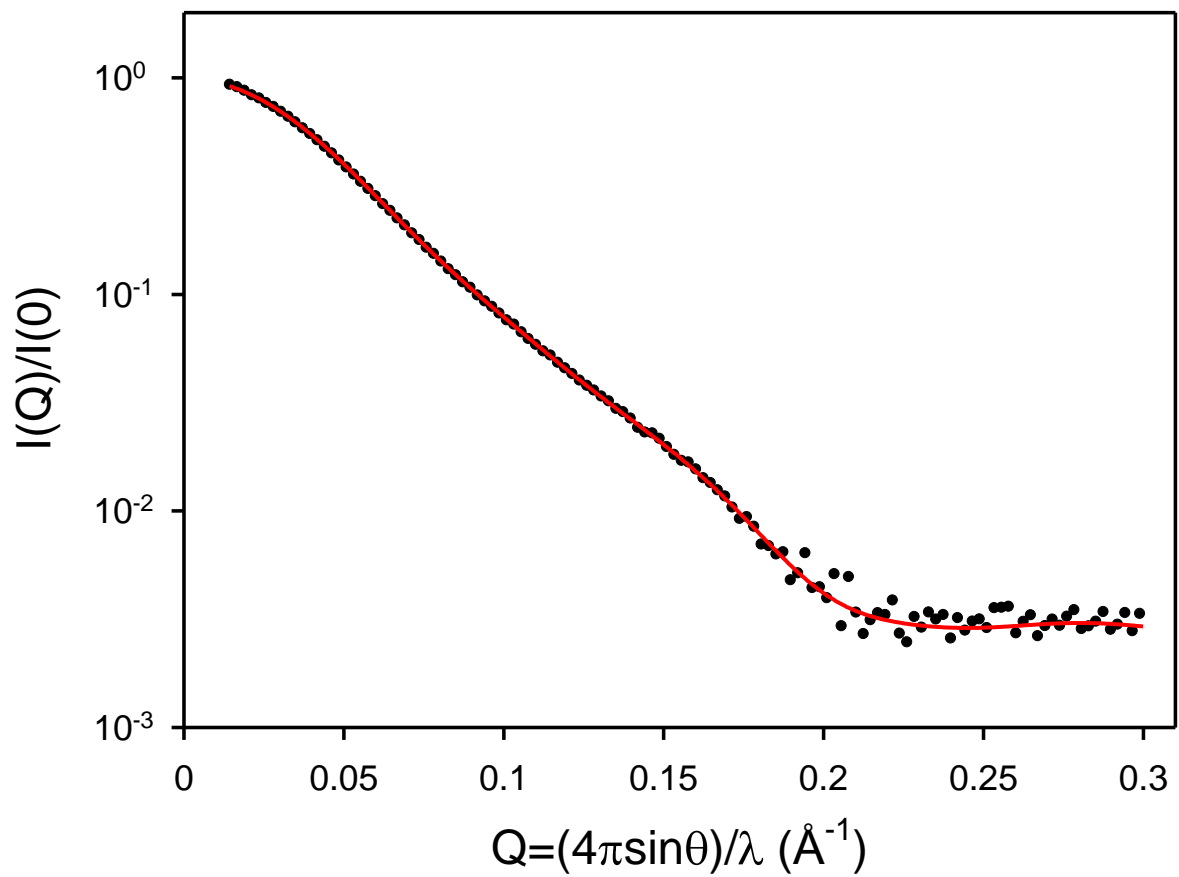

**Simulation of the SAXS curve extrapolated to the higher ionic strength and associated CPR structures.** The extrapolated SAXS curve is shown in black dots and the best-fit curve obtained from EOM optimization is shown in red.



FIGURE S3

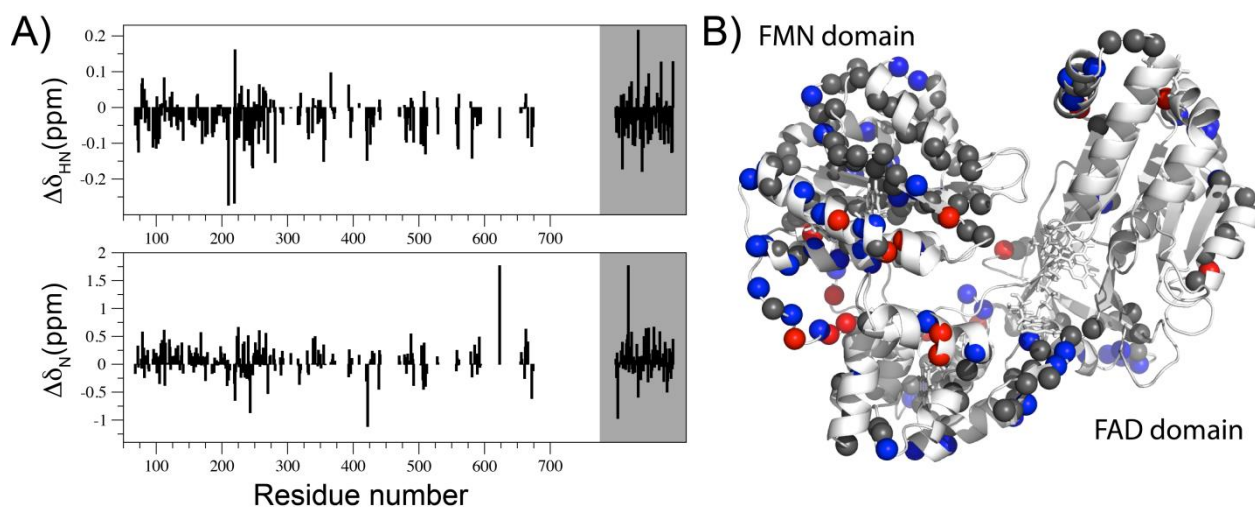

**Chemical shifts variations of selected amino acids at 0 M and 1 M NaCl concentrations.** A, Amide  $^1\text{H}_\text{N}$  and  $^{15}\text{N}$  chemical shift variation ( $\Delta\delta_{\text{H}_\text{N}}$  and  $\Delta\delta_{\text{N}}$ ) versus residue number. The chemical shift variation was calculated as  $\delta_1 - \delta_0$  where  $\delta_0$  and  $\delta_1$  are the chemical shifts observed at 0 and 1M salt concentration respectively. The data for unassigned crosspeaks are represented with a grey background. B, The chemical shift perturbation data are reported on the CPR closed conformation as colored spheres. The N atoms for which chemical shifts data were available are represented as spheres, with the default grey color. In blue color, residues for which  $^1\text{H}$  or  $^{15}\text{N}$  chemical shift variations were larger than one standard deviation value. Residues for which  $^1\text{H}$  or  $^{15}\text{N}$  chemical shift variations are larger than twice the deviation standard value are shown in red.

TABLE S1

|           |                                          | FMN domain |        | FAD/connecting domain |        |
|-----------|------------------------------------------|------------|--------|-----------------------|--------|
| I = 0 M   | $\langle R_1 \rangle$ (s <sup>-1</sup> ) | 0.27       | ± 0.02 | 0.28                  | ± 0.07 |
|           | $\langle R_2 \rangle$ (s <sup>-1</sup> ) | 61         | ± 6    | 61                    | ± 8    |
|           | $\langle R_2/R_1 \rangle$                | 226        | ± 26   | 225                   | ± 44   |
|           | $\langle \tau_c \rangle$ (ns)            | 30.3       | ± 1.8  | 30.1                  | ± 3.3  |
| I = 0.8 M | $\langle R_1 \rangle$ (s <sup>-1</sup> ) | 0.53       | ± 0.09 | 0.33                  | ± 0.07 |
|           | $\langle R_2 \rangle$ (s <sup>-1</sup> ) | 31.5       | ± 4.5  | 54.8                  | ± 13.5 |
|           | $\langle R_2/R_1 \rangle$                | 59.8       | ± 20.0 | 181                   | ± 71   |
|           | $\langle \tau_c \rangle$ (ns)            | 15.2       | ± 2.6  | 26.6                  | ± 5.4  |
| I = 1 M   | $\langle R_1 \rangle$ (s <sup>-1</sup> ) | 0.82       | ± 0.47 | 0.43                  | ± 0.25 |
|           | $\langle R_2 \rangle$ (s <sup>-1</sup> ) | 23.0       | ± 4.6  | 49.8                  | ± 14.1 |
|           | $\langle R_2/R_1 \rangle$                | 31.8       | ± 12.8 | 159                   | ± 75   |
|           | $\langle \tau_c \rangle$ (ns)            | 11.0       | ± 2.0  | 24.8                  | ± 2.6  |

Averaged NMR <sup>15</sup>N relaxation parameters and correlation times derived from the <sup>15</sup>N R<sub>2</sub>/R<sub>1</sub> ratios collected at 0 M (3), 0.8 M and 1 M NaCl concentrations.

FIGURE S4

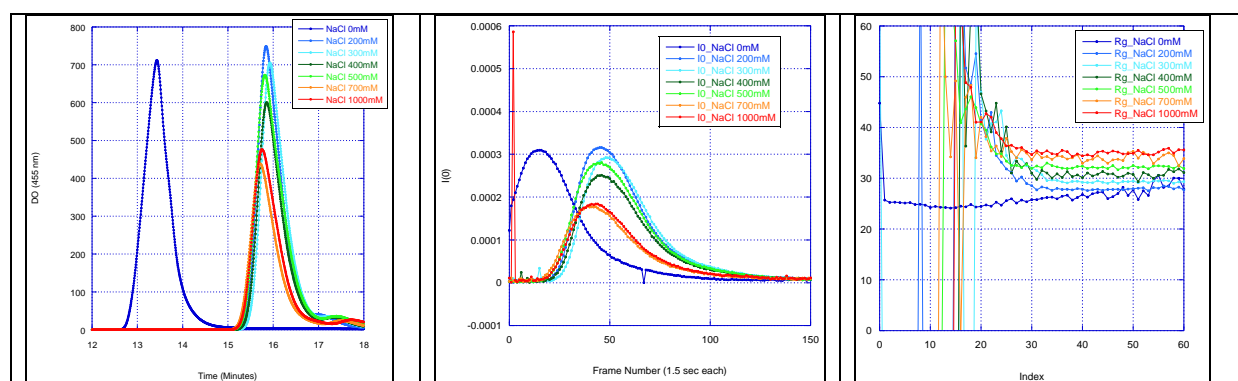

**SAXS elution profiles of the CPR solutions under several salt concentrations at pH 7.4.**

For each condition, 50  $\mu$ l of CPR at about 10 g/l were injected and flown through an Agilent Biosec3-300 SEC column at 0.2 ml/min, T=20°C. SAXS acquisition started with the same delay after injection for all the investigated conditions.

A/ The absorption at 455 nm measured before the SAXS cell, is shown as a function of time. The protein was eluted at similar times for all conditions, except for the case of no ionic strength, where unscreened intermolecular repulsion is probably the origin of the observed shift in the elution time.

B/ The  $I(0)$  values extrapolated using Guinier linearization are shown as a function of the frame number. The  $I(0)$  values closely follow the 455 nm absorption profiles, underlying the fact that the protein is a monomer in all cases.

C/ The  $R_g$  values extrapolated using Guinier linearization are shown as a function of the frame number. The large  $R_g$  values observed in the frames before the main elution peak denote the presence of a very small amount of aggregates in the injected solutions, thus justifying the use of the SEC-SAXS set-up. The existence of a plateau in the  $R_g$  profile at all conditions except at  $[\text{NaCl}]=0$  mM clearly proves the sample monodispersity under the main elution peak, from which the SAXS curves were further selected and averaged. The  $R_g$  profile at  $[\text{NaCl}]=0$  mM displays a concentration dependent curve, with  $R_g$  values decreasing with increasing concentration. This behavior is typical of unscreened intermolecular repulsions. The small  $Q$ -range part of the final SAXS curve at  $[\text{NaCl}]=0$  mM was therefore taken from a very low concentration frame (number 33), where intermolecular effects were negligible, and rescaled to the large  $Q$ -values part, taken from the average of the curves under the elution peak, to gain more statistics.

## SUPPORTING REFERENCES

1. Haque, M. M., M. Bayachou, M. A. Fadlalla, D. Durra, and D. J. Stuehr. 2013. Charge-pairing interactions control the conformational setpoint and motions of the FMN domain in neuronal nitric oxide synthase. *Biochem. J.* 450:607-617.
2. Haque, M. M., C. Kenney, J. Tejero, and D. J. Stuehr. 2011. A kinetic model linking protein conformational motions, interflavin electron transfer and electron flux through a dual-flavin enzyme-simulating the reductase activity of the endothelial and neuronal nitric oxide synthase flavoprotein domains. *FEBS J.* 278:4055-4069.
3. Vincent, B., N. Morellet, F. Fatemi, L. Aigrain, G. Truan, E. Guittet, and E. Lescop. 2012. The closed and compact domain organization of the 70-kDa human cytochrome P450 reductase in its oxidized state as revealed by NMR. *J. Mol. Biol.* 420:296-309.
